# Supplementary material
Source: PubMed Central journal article supplement (PMC7615256)
Supplement: EMS189847-supplement-Supplementary_Data.pdf [file EMS189847-supplement-Supplementary_Data.pdf]

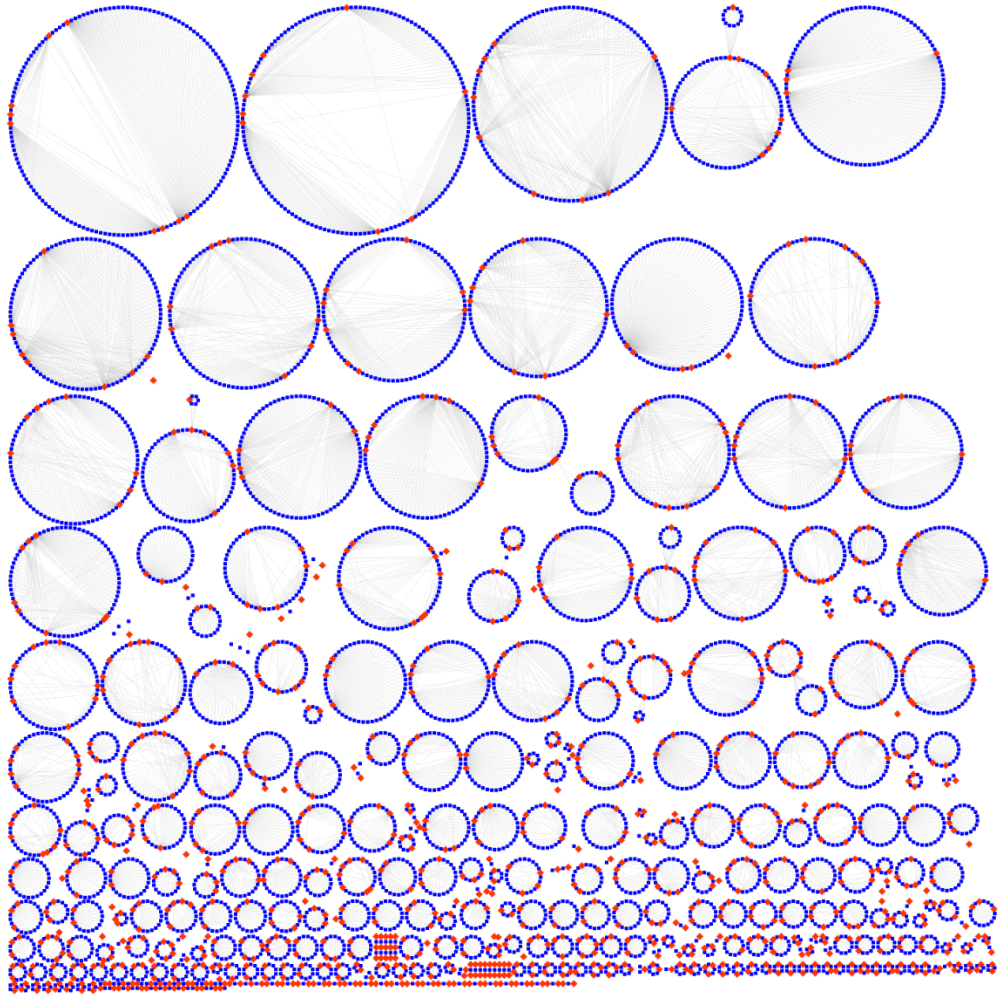

**Supplementary Figure 1: Transportome Multi-Knock network.** Overview of sgRNAs (blue) and the targeted genes (red) network for the CRISPR library targeting the transporters family. Shown are 1,123 transporter genes (red) and 5,635 sgRNAs (blue).

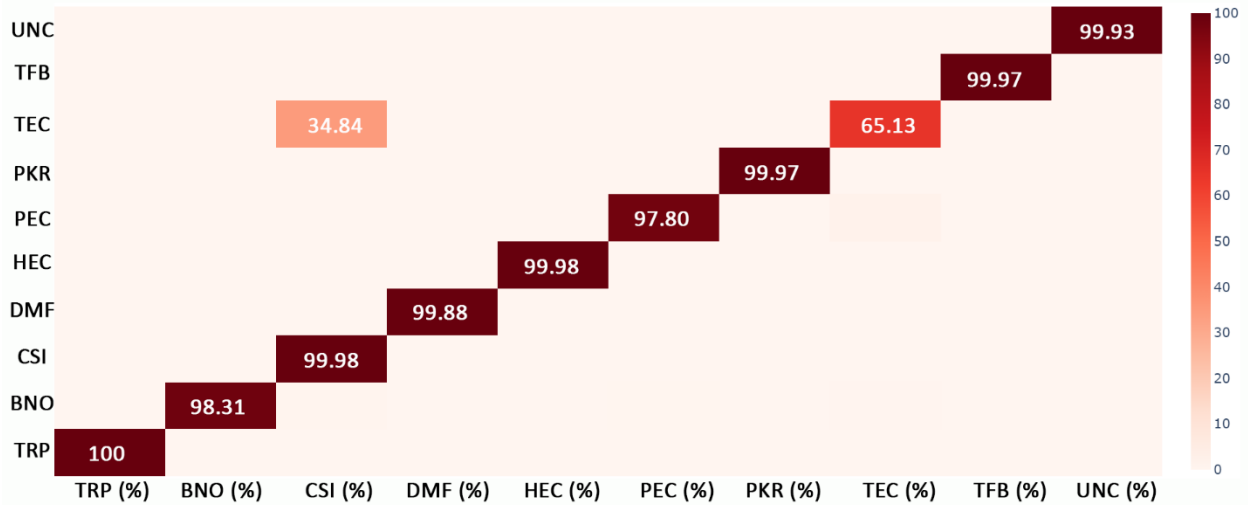

**Supplementary Figure 2: sgRNAs cross-contamination analysis of the ten sub-libraries based on next-generation sequencing.** Heatmap illustrating the percentage of sgRNAs for each individual sub-library. The color scale bar reflects the relative percentage. All libraries are highly specific, except for TEC which shows significant amplification of the CSI sub-library. TRP (transporters); PKR (protein kinases, protein phosphatases, receptors, and their ligands); TFB (transcription factors and other RNA and DNA binding proteins); BNO (proteins binding small molecules); CSI (proteins that form or interact with protein complexes including stabilizing factors); HEC (hydrolytic enzymes); TEC (metabolic enzymes and enzymes that catalyze transfer reactions); PEC (catalytically active proteins, mainly enzymes); DMF (proteins with diverse functional annotations not found in the other categories); and UNC (proteins of unknown function or cannot be inferred).

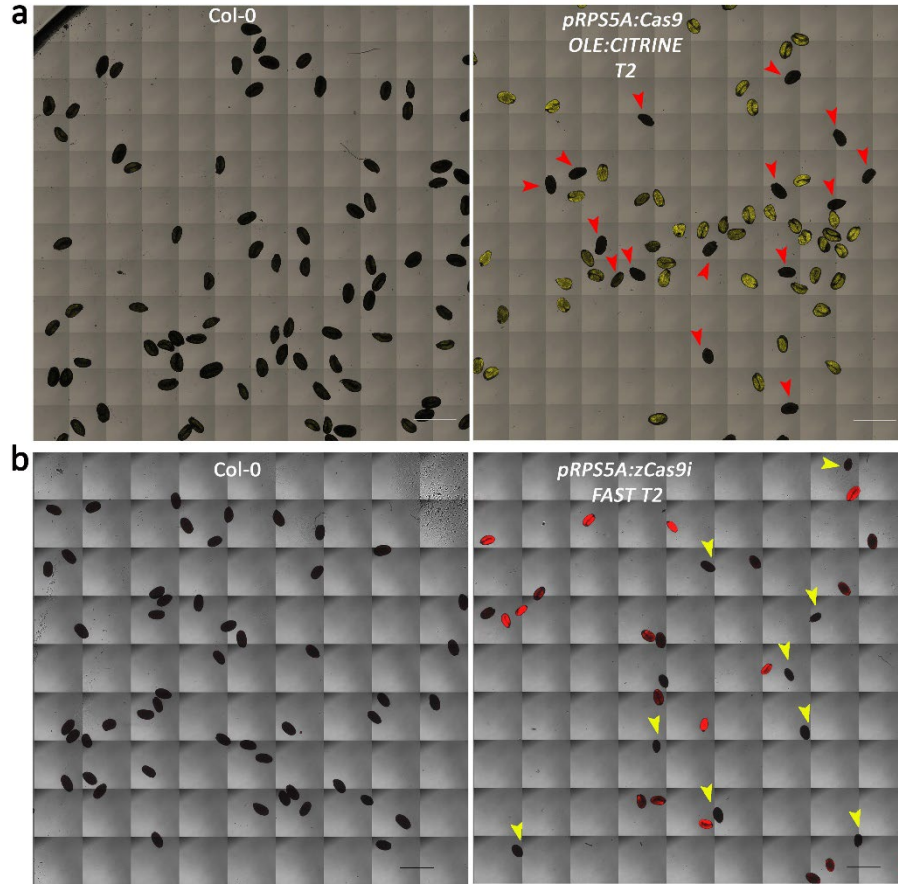

**Supplementary Figure 3. Visual fluorescence segregation for Cas9-free seeds.** **a**, Cas9-free seeds selection in pRPS5A:Cas9 OLE:CITRINE T2 seeds. Yellow signal in seeds indicates for OLE:CITRINE. The Cas9-free seeds, which do not produce the yellow fluorescence, are marked by red arrows. Scale bar = 1 mm. **b**, Cas9-free seeds selection in pRPS5A:zCas9i FAST T2 seeds. The Cas9-free seeds, which do not produce the red fluorescence, are marked by yellow arrows. FAST (pOLE1:tagRFP)<sup>1</sup>. Scale bar = 1 mm.

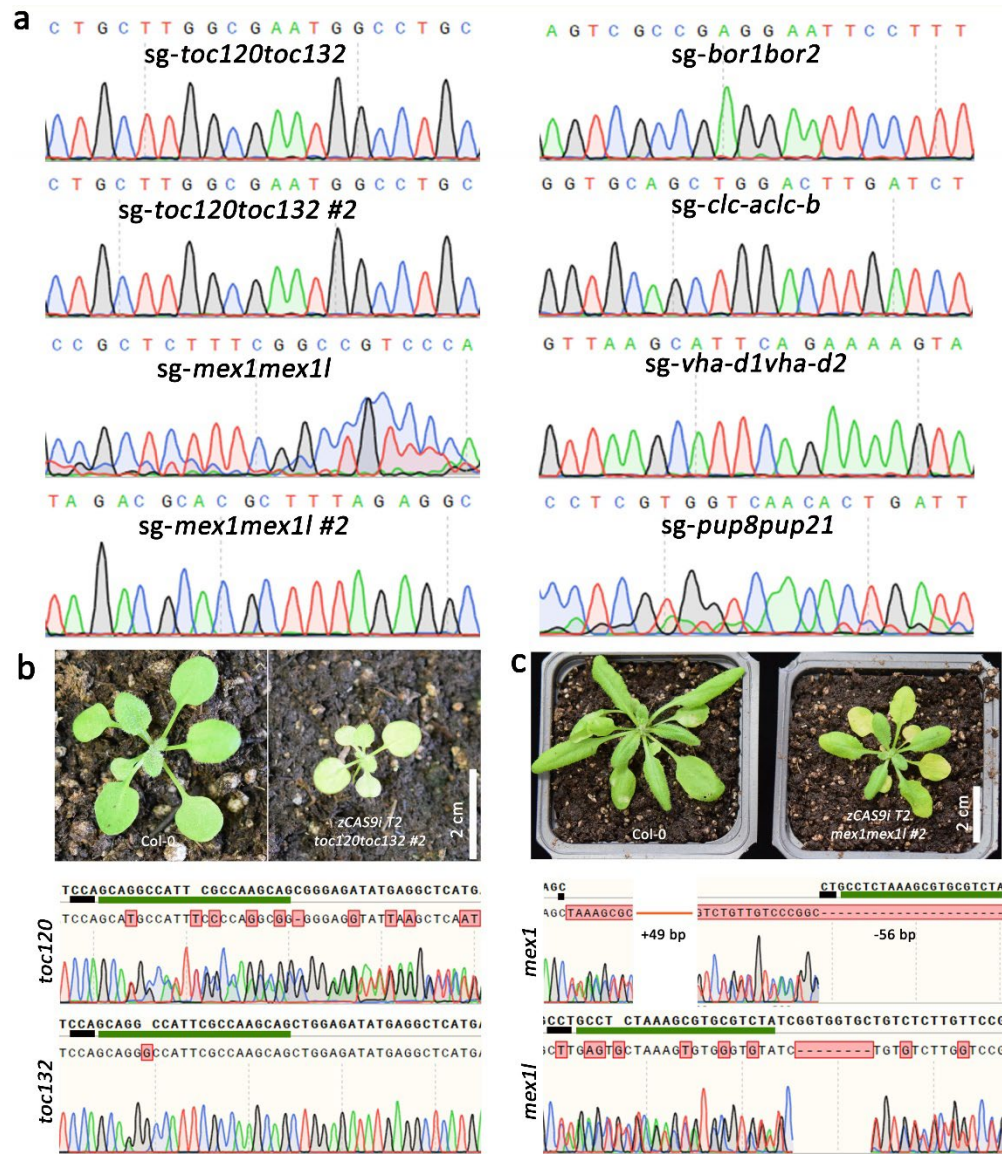

**Supplementary Figure 4. Sequencing data for multiple sgRNA and their putative target genes. a,** Chromatograms show sgRNA sequences of the indicated TRP Multi-Knock lines. Lines are presented in Fig 4. Two additional lines are presented for *toc132toc120* and *mex1mex1l* (#2). **b,c,** Shown are *toc132toc120* (**b**) and *mex1mex1l* (**c**) knockout alleles, which are additional to the lines presented in Fig 4. Photographs show an independent line for *toc120toc132* #2 (left). Chromatograms indicate for the types of mutation (left). Images show a similar independent line for *mex1mex1l* #2 (right). Chromatograms indicate for the types of mutation (right). Scale bar = 2 cm; PAM is marked with a black underline; 20-bp gRNA is underlined in green.

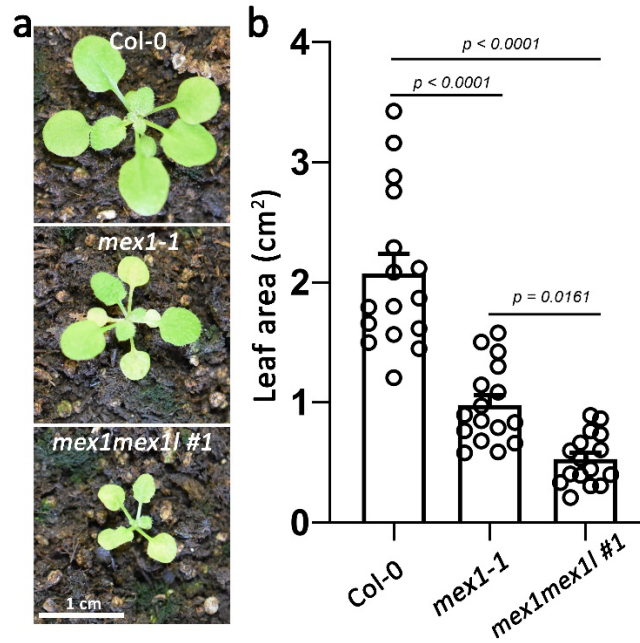

**Supplementary Figure 5. *mex1* and *mex11*, single and double knockout phenotypes.** **a**, Representative images showing shoot phenotypes of 18-day-old of the wild type (Col-0), single (*mex1-1*) and double mutant homozygous plants (*mex1mex11 T3 #1*). Scale bar = 1 cm. **b**, Quantification of phenotypes shown in (a). Shown are means ( $\pm$ SE),  $n = 16$  plants,  $p$  values were determined by One-way ANOVA.

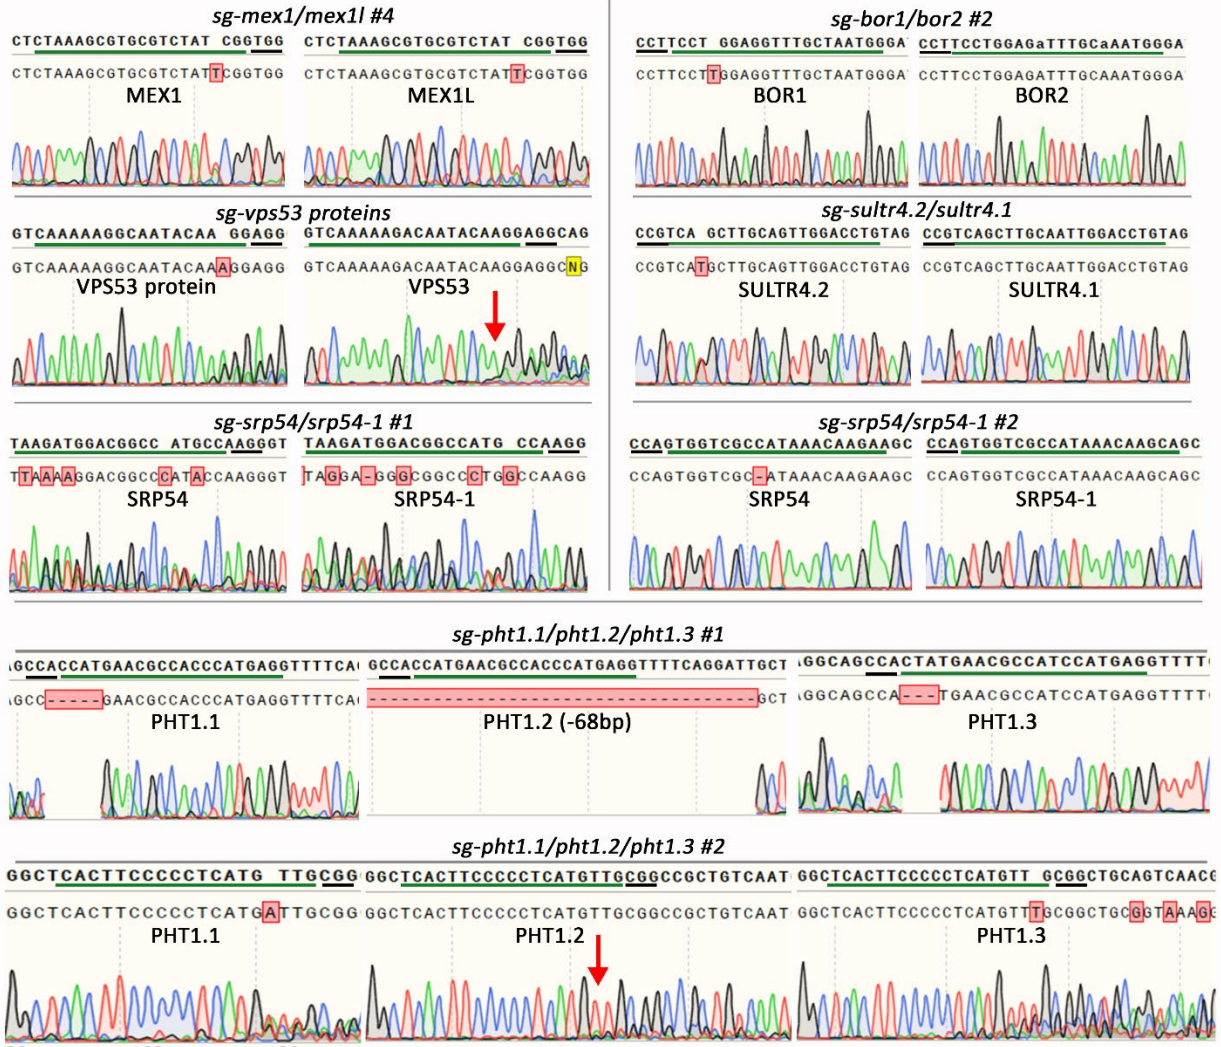

**Supplementary Figure 6. Single, double, and triple mutants generated by Multi-Knock.** Shown are Sanger sequencing chromatograms indicating the type of mutation in T2 lines. mex1mex1l #4 and bor1bor2 #2 are additional lines (independent lines) to the ones presented in Fig. 4 and Sup. Fig. 4. Two similar independent lines with different sgRNAs targeting the same targets (Phosphate transporters: PHT1.1, PHT1.2, and PHT1.3) show different mutation types. The ambiguous peak is indicated by a red arrow. PAM is marked with a black underline; 20-bp gRNA is underlined in green.

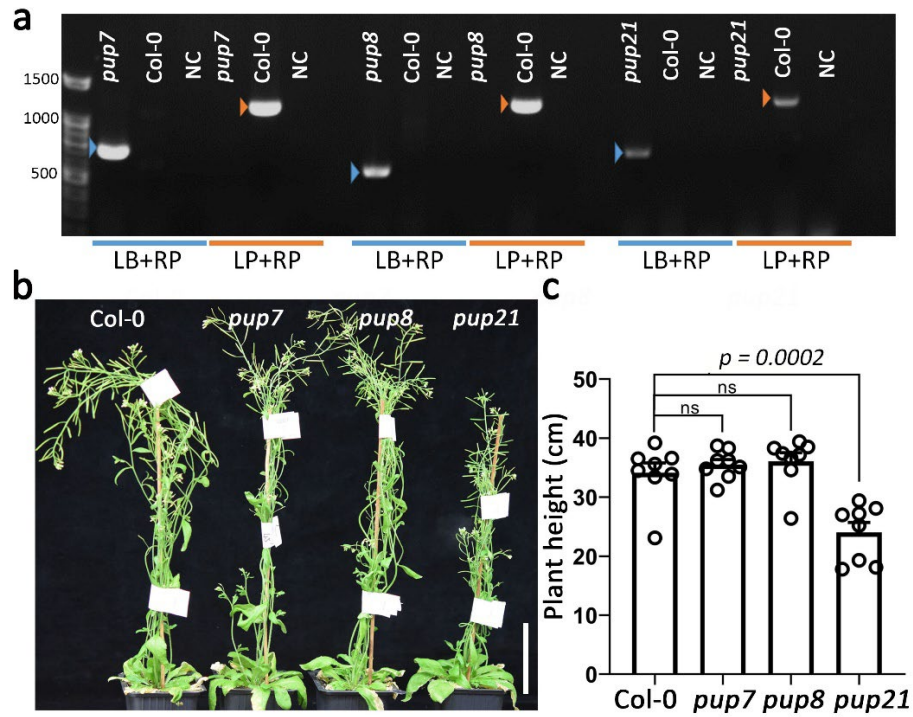

**Supplementary Figure 7: Characterization of single T-DNA insertion mutants.** **a**, Genotyping of the *pup7*, *pup8*, *pup21* single mutant plants compared to Col-0. Orange arrows indicate for WT amplification bands, blue arrows indicated for T-DNA insertion amplification bands. LB: left border primer of T-DNA insertion, LP: left genomic primer, RP: right genomic primer, NC: negative control. **b**, Plant height of 58-day-old plants of the indicated genotypes. **c**, Quantification of plant height. Shown are means ( $\pm$ SE),  $n = 8$  plants,  $p$  values were determined by One-way ANOVA. Scale bar = 5 cm.

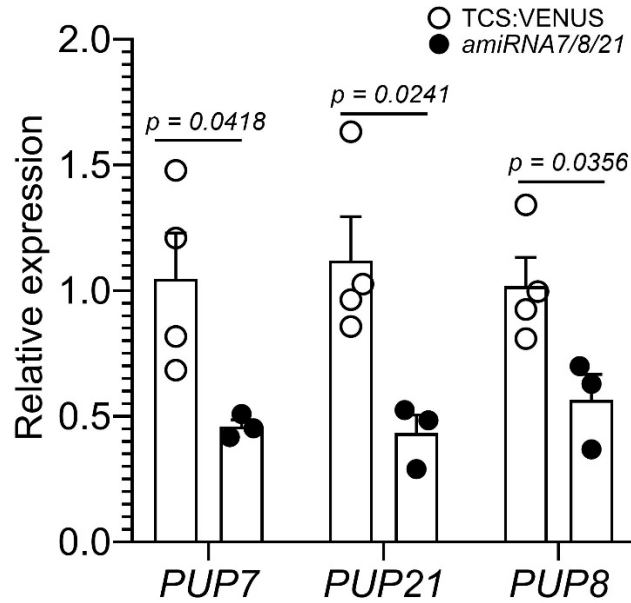

**Supplementary Figure 8: PUP7, PUP8, and PUP21 are down-regulated in *amiR7/8/21*.** Relative expression of the indicated PUP *amiR7/8/21*-targeted genes in 15-day-old seedlings, quantified by qRT-PCR. *amiRNA7/8/21* stands for amiRNA triple knockdown PUP7/8/21. Shown are averages ( $\pm$ SE),  $n = 4$  (Control),  $n = 3$  (*amiR7/8/21*);  $p$  value two tailed  $t$  test is indicated for each analysis.

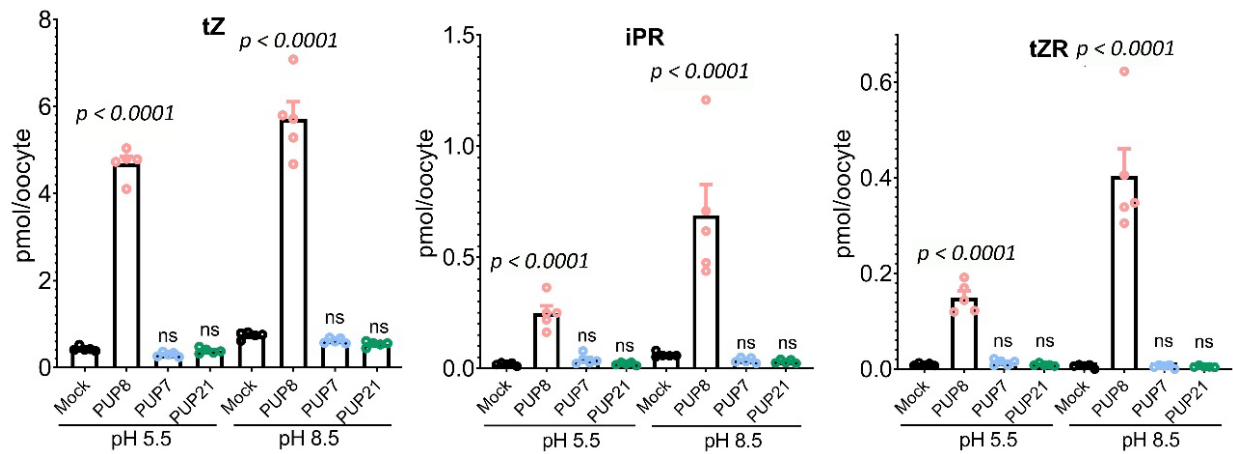

**Supplementary Figure 9: PUP8 promotes cytokinin uptake in *Xenopus laevis* oocytes.** 60 min transport assay in 10  $\mu$ M cytokinin at pH = 5.5 and pH = 8.5.  $n = 5 \pm$ SE,  $p$  values were determined by One-way ANOVA.



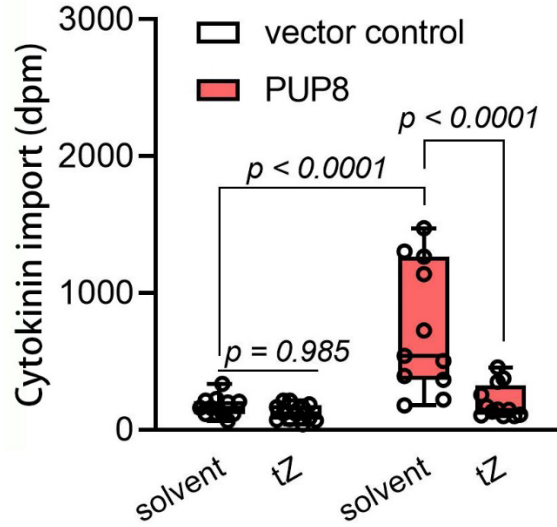

**Supplementary Figure 10: PUP8 tZ competition assays.** 3H-tZ import into microsomal fractions prepared from tobacco leaves infiltrated with vector control and 35S:YFP-PUP8 (PUP8), conducted in the absence (solvent) and presence of a 1,000-fold excess of non-labelled tZ. Significant differences of means to solvent control were determined by ordinary One-way ANOVA,  $n = 12$  (vector control - solvent and tZ; and PUP8 - tZ),  $n = 11$  (PUP8 - solvent). Box plots represent 25<sup>th</sup>-75<sup>th</sup> percentiles; whiskers represent min-max (with all points), central bands in the box plot show the medians.

**Supplementary Table 1. Overview of sgRNAs and gene numbers per family.**

| <b>Families</b> | <b>Targeted genes per family<br/>(Coverage %)</b> | <b>Genes per<br/>family</b> | <b>sgRNAs<br/>per family</b> |
|-----------------|---------------------------------------------------|-----------------------------|------------------------------|
| <b>BNO</b>      | 1443 (76.1%)                                      | 1896                        | 5899                         |
| <b>CSI</b>      | 1399 (82.7%)                                      | 1692                        | 4919                         |
| <b>DMF</b>      | 1343 (71.0%)                                      | 1891                        | 5000                         |
| <b>HEC</b>      | 1438 (84.3%)                                      | 1706                        | 6215                         |
| <b>PEC</b>      | 1252 (82.6%)                                      | 1515                        | 4975                         |
| <b>PKR</b>      | 1190 (84.7%)                                      | 1405                        | 6161                         |
| <b>TEC</b>      | 1041 (86.0%)                                      | 1211                        | 4145                         |
| <b>TFB</b>      | 2042 (78.2%)                                      | 2611                        | 6010                         |
| <b>TRP</b>      | 1123 (84.6%)                                      | 1327                        | 5635                         |
| <b>UNC</b>      | 3881 (59.3%)                                      | 6544                        | 10170                        |



**Supplementary Table 3. Primers for amplification of subgroups of sgRNA library**

| <b>Pools</b> | <b>Forward primer (5'-3')</b> | <b>Reverse primer (5'-3')</b> |
|--------------|-------------------------------|-------------------------------|
| <b>PKR</b>   | CTGGTCATCATCCTGCCTTT          | TTTGCCCCCTCCATATAACA          |
| <b>BNO</b>   | GGATTATTCATACCGTCCCA          | CAAATGTGGTATGGCTGATT          |
| <b>CSI</b>   | AGAGCTCGTTTAGTGAACCG          | GTGGTTTGTCCAAACTCATC          |
| <b>TFB</b>   | CGTTGGCTACCCGTGATATT          | GCCCAGTCATAGCCGAATAG          |
| <b>TEC</b>   | TGTAAAACGACGGCCAGT            | AACAGCTATGACCATGATTACG        |
| <b>PEC</b>   | GGAAACAGCTATGACCATG           | GGTTTTCCAGTCACGAC             |
| <b>UNC</b>   | CGACTCACTATAGGGAGAGCGGC       | AAGAACATCGATTTTCCATGGCAG      |
| <b>DMF</b>   | TCCTCCGCTTATTGATATGC          | GGAAGTAAAAGTCGTAACAAGG        |
| <b>HEC</b>   | GCGAGAGTAGGGAAGTGC            | AACATCAGAGATTTTGAGACAC        |
| <b>TRP</b>   | CCAAGCTATTTAGGTGACACGG        | CCTCGACTGTGCCTTCTAGG          |

**Supplementary Table 4. Primers for NGS PCR amplification and sgRNAs genotyping in transgenic plants.**

| <b>Cas9 expression constructs</b> | <b>Forward primer (5'-3')</b> | <b>Reverse primer (5'-3')</b> |
|-----------------------------------|-------------------------------|-------------------------------|
| pRPS5A:zCas9i                     | TACTAGATCGACGCTACTAG          | CCGACTCGGTGCCACTTTT           |
| pUBI:Cas9                         | CCCCTGGGAATCTGAAAGAAG         | CCGACTCGGTGCCACTTTT           |
| pEC:Cas9                          | CCCCTGGGAATCTGAAAGAAG         | CCGACTCGGTGCCACTTTT           |
| pRPS5A:Cas9 OLE:CITRIN            | CCCCTGGGAATCTGAAAGAAG         | CCGACTCGGTGCCACTTTT           |

**Supplementary Table 5. Primers used for PCR-based genotyping.**

| <b>Targets</b> | <b>Forward primer (5'-3')</b> | <b>Reverse primer (5'-3')</b> |
|----------------|-------------------------------|-------------------------------|
| TOC120         | CTCTTACGCACCATCACTG           | GCTTCGGCAAGAATCTTGG           |
| TOC132         | TCTCCTGCGCACCATAAGT           | TCACCATACTGCTGTTTCCAG         |
| MEX1           | AGGGAAATCCAGGTTTGGG           | CTGCCACAGCAATACCAAAG          |
| MEX1L          | AGGGAAATCCAGGTTTGGG           | GAGTAGAGACCACTCCAG            |
| BOR1           | GCTTTTCATGCAGCAAGCCA          | GAACATCAAGCATCTCCTGC          |
| BOR2           | GGCCTTCTTATAGCTATGCTC         | GGAAGTTGAAGCATCTCCTGA         |
| CLC-a          | GACACTCCCAATATGTTTGG          | CAGAGGCAGATCCACATGT           |
| CLC-b          | GGAATCCCTGAGATCAAAGC          | AGTACACCTCCAACAGGTG           |
| VHA-d1         | CCGCATCAACCTTTTCCATC          | GAGGGTGTTCCTCATAATCTC         |
| VHA-d2         | CCCTTAGCTGTTTCATAACCC         | CAAGGTATGCTTTGTAGAGGG         |
| PUP7           | CTCTTTTGCCAGCCACTAGCT         | CCACAAGAAGAGCAGAGGATACAG      |
| PUP8           | CCCAAACCAAAAATCCCAAACC        | CCAGGGATAGCAGCAATCCAA         |
| PUP21          | TTTCAGTACCTCAAACGAAGAACTGT    | AGTACCACACAAGTTGCAACTAG       |
| VPS53          | GCTTGTGGCCCAAGTACATC          | GGTAGCCTAGCGTTAAATTTG         |
| VPS53-P        | GATGTTGCTGGTTAGCCTCTT         | GGGAGAGTAATCTGCTAGGTAG        |
| SULTR4.1       | GAAGTACTCCTGCTCTTGG           | AGACGCAACATGACACAAC           |
| SULTR4.2       | GGCTTCAACCAATATACGG           | CGAATAAGCCATCCAAGCC           |
| SRP54          | TACTGAGTTGTGATTCTTGC          | AATGCTAAATCAATGCCATGA         |
| SRP54-1        | GCTGACAGGAAAAATGCTAAT         | CTCATCCATATGCTCTCCTGTTC       |
| PHT1.1         | CTCTAGGAAATGGCCGAA            | CCATTTAGTTGGATCTTAAACC        |
| PHT1.2         | GAGAGGCTTAGATGGCTGA           | CCATTTAGTTGGATCTTAAACC        |
| PHT1.3         | GCGTACGATCTCTTTTGTGT          | CATTAGTTGGATCGCAAACC          |

**Supplementary Table 6. Genotyping primers for T-DNA lines**

| Gene  | T-DNA Line  | Primer name | Primer sequence (5'-3')    |
|-------|-------------|-------------|----------------------------|
| PUP7  | SALK_084103 | LP          | GTAGAGCCGCCATTCAAAAG       |
|       |             | RP          | GAGAACTACACAACCTCGCAAC     |
|       |             | LB          | ATTTTGCCGATTTTCGGAAC       |
| PUP8  | SALK_137526 | LP          | TCGTTGTTGACTTCCAAATCC      |
|       |             | RP          | TGAGGATCAGTTGTACCAGGG      |
|       |             | LB          | ATTTTGCCGATTTTCGGAAC       |
| PUP21 | GK-288E11   | LP          | AGCAAAAGGTACCTGATGACG      |
|       |             | RP          | CTTTTCGTTCGAGGTAGTGCTG     |
|       |             | LB          | ATAATAACGCTGCGGACATCTACATT |

**Supplementary Table 7. PUP cloning**

| Cloning primers. Gene | Forward primer (5'-3')           | Reverse primer (5'-3')            |
|-----------------------|----------------------------------|-----------------------------------|
| <i>PUP7</i> genomic   | caccATGGACAGATCTCAAGAACACTA TGCC | TCACACACTTTGTATGTTTGTGTGAC C      |
| <i>PUP8</i> CDS       | caccATGGAAATAACTCAAGTAATCTA TGT  | TCATACACTATGTATGTTTGTGTGAC CTTCC  |
| <i>PUP21</i> CDS      | caccATGGGCATATCTCAAGTACACTA TTGC | TCATAAAGTTTGTGTTTCTTCCTCAA CAGGTT |

**Supplementary Table 8. MRM transitions for LC-MS/MS analysis.**

| Analyte                | Retention Time [min] | Q1 [m/z] | Q3 [m/z]            | CE [eV] | Reference             |
|------------------------|----------------------|----------|---------------------|---------|-----------------------|
| tZ [M+H] <sup>+</sup>  | 1.25                 | 220.0    | 136.0 <sup>Qt</sup> | 15      | (Ionescu et al. 2017) |
| tZR [M+H] <sup>+</sup> | 1.40                 | 352.0    | 220.0 <sup>Qt</sup> | 15      | (Ionescu et al. 2017) |
| iPR [M+H] <sup>+</sup> | 1.60                 | 336.1    | 204.0 <sup>Qt</sup> | 15      | (Ionescu et al. 2017) |
|                        |                      | 336.1    | 136.0               | 27      |                       |
|                        |                      | 336.1    | 148.0               | 23      |                       |

Qt = quantifier ion, additional transitions were used for identification only; CE=collision energy; Q=quadrupole.

**References:**

1. Shimada, T. L., Shimada, T. & Hara-Nishimura, I. A rapid and non-destructive screenable marker, FAST, for identifying transformed seeds of *Arabidopsis thaliana*: TECHNICAL ADVANCE. *Plant J.* **61**, 519–528 (2010).
